# Supplementary material for: アイルランド系アメリカ人とアイルランド独立戦争(1) : アイルランド救済アメリカ委員会とアイルランド白十字
Source: Royal Society of Chemistry journal article supplement (doi:10.1039/b606680a), 2004-10-30
Supplement: b606680a.pdf [file b606680a.pdf]

SUPPORTING INFORMATION

for the  
communication  
entitled

**Tandem Azidination- and Hydroazidation-Huisgen [3 + 2] Cycloadditions of  
Ynamides. Syntheses of Chiral Amide Substituted Triazoles.**

authored by

Xuerjun Zhang, Richard P. Hsung\*, and Lingfeng You

*Division of Pharmaceutical Sciences and Department of Chemistry  
7111 Rennebohm Hall, 777 Highland Avenue  
University of Wisconsin, Madison, WI 53705*

**GENERAL PROCEDURES FOR SYNTHESIS OF CHIRAL AMIDE-SUBSTITUTED TRIAZOLES FROM YNAMIDES AND BENZYL AZIDE.**

To a vial charged with ynamide **5** (50.0 mg, 0.267 mmol) were added CuSO<sub>4</sub>·5H<sub>2</sub>O (3.30 mg, 0.0134 mmol, 0.050 equiv), Na-Ascorbate (2.70 mg, 0.0134 mmol, 0.050 equiv), benzyl azide (37.0 μL, 0.294 mmol, 1.1 equiv), and *t*-butanol (0.50 mL). The mixture was stirred at rt for 2 min before H<sub>2</sub>O (1 mL) was added. The reaction mixture was then vigorously stirred at rt for 12 h under nitrogen. After TLC showed that all ynamide **5** was consumed, the reaction mixture was diluted with H<sub>2</sub>O (8 mL) and extracted with EtOAc (3 x 10 mL). The combined organic layers were washed with sat aq NaCl and dried over Na<sub>2</sub>SO<sub>4</sub>. Removal of solvent under reduced pressure gave crude triazole **7a**, which was purified via silica gel chromatography (using EtOAc/hexane as gradient eluent) to yield the pure triazole **7a** (70.0 mg, 82%) as a white solid.

**GENERAL PROCEDURES FOR SYNTHESIS OF CHIRAL AMIDE-SUBSTITUTED TRIAZOLES FROM YNAMIDES AND IODOBENZENE (OR VINYL IODIDE): TANDEM AZIDINATION-[3 + 2].**

To a solution of iodobenzene (0.086 mL, 157.0 mg, 0.77 mmol, 1.2 equiv) in DMSO/H<sub>2</sub>O (4:1: 2.4 mL DMSO + 0.6 mL H<sub>2</sub>O) were added K<sub>2</sub>CO<sub>3</sub> (17.7 mg, 0.128 mmol, 0.20 equiv), *L*-proline (14.8 mg, 0.128 mmol, 0.20 equiv), CuSO<sub>4</sub>·5H<sub>2</sub>O (16.1 mg, 0.064 mmol, 0.10 equiv), Na-Ascorbate (25.4 mg, 0.128 mmol, 0.20 equiv), and sodium azide (58.4 mg, 0.90 mmol, 1.4 equiv). After the reaction mixture was stirred at 70 °C for 10 min, ynamide **5** (120.0 mg, 0.64 mmol, 1.0 equiv) in DMSO (3 mL) was added by syringe pump over 10 h. The reaction mixture was then vigorously stirred at 70 °C for an additional 2 h. After TLC showed all ynamide **5** was consumed, the reaction mixture was poured into dilute NH<sub>4</sub>OH (15 mL), and then extracted by EtOAc (3 x 15 mL). The combined organic layers were washed with sat aq NaCl and dried over Na<sub>2</sub>SO<sub>4</sub>. Removal of solvent under reduced pressure gave crude triazole **17**, which was purified via silica gel chromatography (using EtOAc/hexane as gradient eluent) to yield the pure triazole **17** (147.0 mg, 75%) as a white solid.

**GENERAL PROCEDURES FOR TANDEM HYDROAZIDINATION-[3 + 2] CYCLOADDITIONS:**

To a vial containing ynamide **5** (60.0 mg, 0.32 mmol) were added CuSO<sub>4</sub>·5H<sub>2</sub>O (8.10 mg, 0.032 mmol, 0.10 equiv), Na-Ascorbate (12.7 mg, 0.064 mmol, 0.20 equiv), phenyl acetylene (53.0 μL, 0.48 mmol, 1.50 equiv), sodium azide (29.2 mg, 0.45 mmol, 1.40 equiv), and *t*-butanol (1.1 mL). The mixture was stirred at rt for 2 min before H<sub>2</sub>O (2.2 mL) was added. The reaction was then vigorously stirred at rt 24 h under nitrogen. After TLC showed all ynamide **5** was consumed, the reaction mixture was poured into dilute NH<sub>4</sub>OH (8 mL), and extracted by EtOAc (3 x 10 mL). The combined organic layers were washed with sat aq NaCl and dried over Na<sub>2</sub>SO<sub>4</sub>. Removal of solvent under reduced pressure gave crude mixture of **18** and **38c**, which was purified via silica gel chromatography (using EtOAc/hexane as gradient eluent) to yield both **18** (22.0 mg, 31%) and **38c** (16.0 mg, 15%) as white solids.

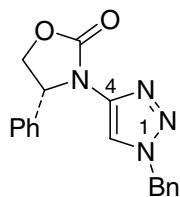

**7a**

$R_f = 0.38$  [50% EtOAc in hexanes]; mp 148-151 °C;  $[\alpha]_D^{20} = -2.50$  ( $c$  0.88,  $\text{CHCl}_3$ );  
IR (film)  $\text{cm}^{-1}$  3171(m), 3145(m), 3031(w), 2916(w), 1758(s), 1585(m), 1557(m), 1422(m), 1290(w),  
1220(m), 1117(m), 1048(m), 1032(w);  $^1\text{H}$  NMR (500 MHz,  $\text{CDCl}_3$ )  $\delta$  4.36 (dd, 1 H,  $J = 4.5, 9.0$  Hz ),  
4.83 (dd, 1 H,  $J = 9.0, 9.0$  Hz ), 5.34-5.45 (m, 2 H), 5.65 (dd, 1 H,  $J = 4.5, 9.0$  Hz ), 7.21-7.24 (m, 2 H),  
7.28-7.37 (m, 8 H), 7.81 (s, 1 H);  $^{13}\text{C}$  NMR (125 MHz,  $\text{CDCl}_3$ )  $\delta$  54.8, 58.9, 71.3, 113.0, 126.4, 126.5,  
128.2, 128.7, 128.8, 129.1, 134.2, 138.8, 143.1, 154.9; mass spectrum (ESI):  $m/e$  (% relative intensity)  
321.4 (33) ( $\text{M} + \text{H}$ ) $^+$ , 343.4 (100) ( $\text{M} + \text{Na}$ ) $^+$ ; HRMS (ESI) calcd for  $\text{C}_{18}\text{H}_{16}\text{N}_4\text{O}_2\text{Na}$  343.1165, found  
343.1160.

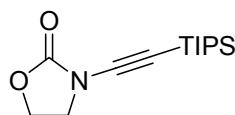

**S1**

$R_f = 0.66$  [50% EtOAc in hexanes];  
IR (film)  $\text{cm}^{-1}$  2944(m), 2867(w), 1763(s), 1480(w), 1461(w), 1401(m), 1199(m), 1109(m), 1035(m);  $^1\text{H}$   
NMR (300 MHz,  $\text{CDCl}_3$ )  $\delta$  1.00-1.11 (m, 21 H), 3.95 (dt, 2 H,  $J = 1.5, 7.8$  Hz), 4.43 (dt, 2 H,  $J = 1.5,$   
7.8 Hz);  $^{13}\text{C}$  NMR (125 MHz,  $\text{CDCl}_3$ )  $\delta$  11.2, 18.6, 47.0, 62.8, 70.0, 93.0, 155.8; mass spectrum (ESI):  
 $m/e$  (% relative intensity) 290.2 (100) ( $\text{M} + \text{Na}$ ) $^+$ ; HRMS (ESI) calcd for  $\text{C}_{14}\text{H}_{25}\text{NO}_2\text{SiNa}$  290.1547,  
found 290.1552.

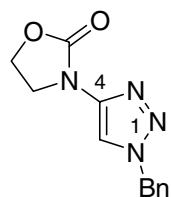

**9a**

$R_f = 0.12$  [50% EtOAc in hexanes]; mp 146-147 °C;  
IR (film)  $\text{cm}^{-1}$  3585(w), 3164(w), 3138 (w), 2987(w), 2920(w), 1745(s), 1590(m), 1439(m), 1421(w),  
1244(m), 1217(m), 1108(m), 1031(m);  $^1\text{H}$  NMR (500 MHz,  $\text{CDCl}_3$ )  $\delta$  4.17-4.23 (m, 2 H), 4.49-4.55 (m,  
2 H), 5.46 (s, 2 H), 7.24-7.28 (m, 2 H), 7.31-7.36 (m, 3 H), 7.82 (s, 1 H);  $^{13}\text{C}$  NMR (125 MHz,  $\text{CDCl}_3$ )  $\delta$

43.6, 54.8, 63.4, 111.8, 128.1, 128.8, 129.1, 134.4, 144.0, 154.8; mass spectrum (ESI):  $m/e$  (% relative intensity) 267.1 (100) ( $M + Na$ )<sup>+</sup>; HRMS (ESI) calcd for  $C_{12}H_{12}N_4O_2Na$  267.0852, found 267.0845.

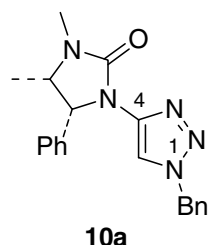

$R_f = 0.14$  [50% EtOAc in hexanes]; mp 206-207 °C;  $[\alpha]_D^{20} = 44.2$  ( $c$  0.76,  $CHCl_3$ ); IR (film)  $cm^{-1}$  3176(w), 3033(w), 2890(w), 2361(m), 2340(m), 1699(s), 1583(m), 1430(m), 1405(m), 1267(m), 1206(m); <sup>1</sup>H NMR (500 MHz,  $CDCl_3$ )  $\delta$  0.86 (d, 3 H,  $J = 6.5$  Hz), 2.83 (s, 3 H), 3.95-4.05 (m, 1 H), 5.29-5.42 (m, 2 H), 5.50 (d, 1 H,  $J = 14.5$  Hz), 7.15-7.40 (m, 10 H), 7.88 (s, 1 H); <sup>13</sup>C NMR (125 MHz,  $CDCl_3$ )  $\delta$  14.8, 28.4, 54.3, 56.1, 60.6, 111.7, 127.5, 127.9, 128.0, 128.2, 128.5, 128.9, 134.4, 136.1, 144.5, 157.7; mass spectrum (ESI):  $m/e$  (% relative intensity) 348.3 (2500) ( $M + H$ )<sup>+</sup>, 370.3 (100) ( $M + Na$ )<sup>+</sup>; HRMS (ESI) calcd for  $C_{20}H_{22}N_5O$  348.1819, found 348.1824.

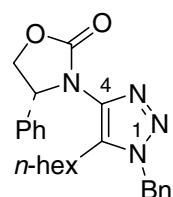

$R_f = 0.46$  [50% EtOAc in hexanes];  $[\alpha]_D^{20} = -51.8$  ( $c$  1.24,  $CHCl_3$ ); IR (film)  $cm^{-1}$  3033(w), 2954(m), 2928(m), 2858(m), 1766(s), 1591(m), 1457(m), 1408(m), 1213(m), 1109(m), 1037(m); <sup>1</sup>H NMR (500 MHz,  $CDCl_3$ )  $\delta$  0.84 (t, 3 H,  $J = 7.5$  Hz), 0.98-1.11 (m, 6 H), 1.13-1.23 (m, 2 H), 2.26-2.32 (m, 1 H), 2.51-2.58 (m, 1 H), 4.45 (dd, 1 H,  $J = 7.5, 9.0$  Hz), 4.87 (dd, 1 H,  $J = 9.0, 9.0$  Hz), 5.38 (s, 2 H), 5.63 (dd, 1 H,  $J = 7.5, 9.0$  Hz), 6.97-7.02 (m, 2 H), 7.25-7.37 (m, 8 H); <sup>13</sup>C NMR (125 MHz,  $CDCl_3$ )  $\delta$  14.0, 22.4, 22.6, 27.5, 29.1, 31.3, 52.6, 61.4, 70.2, 126.9, 127.4, 128.3, 128.9, 129.0, 129.1, 132.7, 134.6, 137.5, 139.0, 155.7; mass spectrum (ESI):  $m/e$  (% relative intensity) 405.3 (340) ( $M + H$ )<sup>+</sup>, 427.3 (100) ( $M + Na$ )<sup>+</sup>; HRMS (ESI) calcd for  $C_{24}H_{28}N_4O_2Na$  427.2104, found 427.2101.

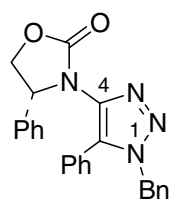

**15a**

$R_f = 0.18$  [33% EtOAc in hexanes];  $[\alpha]_D^{20} = -52.3$  ( $c$  1.77,  $\text{CHCl}_3$ );  
IR (film)  $\text{cm}^{-1}$  3064(m), 3034(m), 2922(m), 1767(s), 1587(m), 1498(m), 1457(m), 1445(m), 1400(m), 1214(m), 1090(m), 1043(w), 1035(w);  $^1\text{H}$  NMR (500 MHz,  $\text{CDCl}_3$ )  $\delta$  4.22 (dd, 1 H,  $J = 8.5, 8.5$  Hz), 4.76 (dd, 1 H,  $J = 8.5, 8.5$  Hz), 5.30 (d, 2 H,  $J = 2.0$  Hz), 5.38 (dd, 1 H,  $J = 8.5, 8.5$  Hz), 6.86-6.89 (m, 2 H), 6.99-7.03 (m, 4 H), 7.13 (dd, 2 H,  $J = 7.5, 7.5$  Hz), 7.18-7.24 (m, 4 H), 7.35 (dd, 2 H,  $J = 7.5, 7.5$  Hz), 7.45 (t, 1 H,  $J = 7.5$  Hz);  $^{13}\text{C}$  NMR (125 MHz,  $\text{CDCl}_3$ )  $\delta$  52.5, 62.5, 70.3, 81.2, 125.3, 127.2, 127.3, 128.2, 128.7, 128.8, 128.9, 129.0, 129.8, 129.9, 134.8, 136.7, 138.7, 156.7; mass spectrum (ESI):  $m/e$  (% relative intensity) 397.3 (147) ( $\text{M} + \text{H}$ ) $^+$ , 419.3 (100) ( $\text{M} + \text{Na}$ ) $^+$ ; HRMS (ESI) calcd for  $\text{C}_{24}\text{H}_{20}\text{N}_4\text{O}_2\text{Na}$  419.1478, found 419.1476.

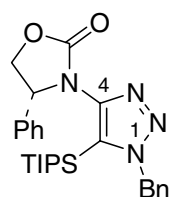

**16a**

$R_f = 0.45$  [50% EtOAc in hexanes]; mp 151-153  $^\circ\text{C}$ ;  $[\alpha]_D^{20} = -68.3$  ( $c$  2.34,  $\text{CHCl}_3$ );  
IR (film)  $\text{cm}^{-1}$  3066(m), 3034(m), 2942(m), 2924(m), 1763(s), 1538(m), 1497(w), 1461(m), 1393(m), 1220(m), 1199(m), 1175(m), 1105(m), 1042(m);  $^1\text{H}$  NMR (500 MHz,  $\text{CDCl}_3$ )  $\delta$  1.13-1.27 (m, 18 H), 1.40-1.55 (m, 3 H), 4.51-4.68 (br, 1 H), 4.70-4.96 (m, 3 H), 4.97-5.10 (br, 1 H), 6.91-7.00 (m, 2 H), 7.21-7.42 (m, 8 H);  $^{13}\text{C}$  NMR (125 MHz,  $\text{CDCl}_3$ )  $\delta$  11.7, 18.8, 50.4, 63.3, 69.7, 105.3, 127.2, 127.9, 128.2, 128.4, 129.6, 129.9, 133.9, 137.0, 137.2, 155.0; mass spectrum (ESI):  $m/e$  (% relative intensity) 477.4 (1000) ( $\text{M} + \text{H}$ ) $^+$ , 499.4 (100) ( $\text{M} + \text{Na}$ ) $^+$ ; HRMS (ESI) calcd for  $\text{C}_{27}\text{H}_{37}\text{N}_4\text{O}_2$  477.2680, found 477.2690.

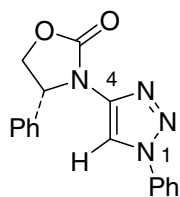

**17**

$R_f = 0.29$  [33% EtOAc in hexanes]; mp 133-134  $^\circ\text{C}$ ;  $[\alpha]_D^{20} = -21.8$  ( $c$  4.79,  $\text{CHCl}_3$ );

IR (film)  $\text{cm}^{-1}$  3584(w), 3176(w), 3065(w), 3033(w), 3014(w), 2918(w), 1759(s), 1583(m), 1502(m), 1469(m), 1414(m), 1218(m), 1139(m), 1039(m);  $^1\text{H}$  NMR (500 MHz,  $\text{CDCl}_3$ )  $\delta$  4.45 (dd, 1 H,  $J = 4.0, 8.5$  Hz), 4.92 (dd, 1 H,  $J = 8.5, 8.5$  Hz), 5.75 (dd, 1 H,  $J = 4.0, 8.5$  Hz), 7.30-7.51 (m, 8 H), 7.71 (d, 2 H,  $J = 7.5$  Hz), 8.37 (s, 1 H);  $^{13}\text{C}$  NMR (125 MHz,  $\text{CDCl}_3$ )  $\delta$  58.9, 71.5, 111.0, 120.2, 126.5, 128.8, 129.2, 129.3, 129.7, 137.0, 138.7, 143.4, 154.9; mass spectrum (ESI):  $m/e$  (% relative intensity) 307.2 (91) ( $\text{M} + \text{H}$ ) $^+$ , 329.2 (100) ( $\text{M} + \text{Na}$ ) $^+$ ; HRMS (ESI) calcd for  $\text{C}_{17}\text{H}_{14}\text{N}_4\text{O}_2\text{Na}$  329.1009, found 329.1009.

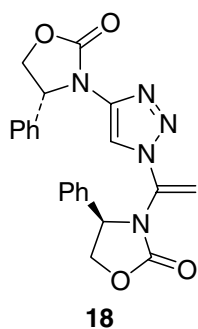

$R_f = 0.30$  [33% EtOAc in hexanes]; 195-196  $^{\circ}\text{C}$   $[\alpha]_{\text{D}}^{20} = -76.0$  ( $c$  0.45,  $\text{CHCl}_3$ );  
IR (film)  $\text{cm}^{-1}$  2919(w), 1766(s), 1660(w), 1586(m), 1458(w), 1403(m), 1217(m), 1090(m), 1036(w), 1027(w);  $^1\text{H}$  NMR (500 MHz,  $\text{CDCl}_3$ )  $\delta$  4.29 (dd, 1 H,  $J = 4.5, 9.0$  Hz), 4.43 (dd, 1 H,  $J = 4.5, 9.0$  Hz), 4.76 (dd, 1 H,  $J = 9.0, 9.0$  Hz), 4.90 (dd, 1 H,  $J = 9.0, 9.0$  Hz), 5.12-5.19 (m, 2 H), 5.34 (dd, 1 H,  $J = 2.5, 5.5$  Hz), 5.66 (dd, 1 H,  $J = 4.5, 9.0$  Hz), 7.16 (dd, 2 H,  $J = 2.5, 7.0$  Hz), 7.24-7.44 (m, 8 H), 7.94 (s, 1 H);  $^{13}\text{C}$  NMR (125 MHz,  $\text{CDCl}_3$ )  $\delta$  59.0, 60.7, 70.3, 71.4, 104.8, 105.0, 111.9, 126.1, 126.5, 127.0, 129.0, 129.2, 129.4, 129.6, 133.7, 136.1, 138.3, 142.8; mass spectrum (ESI):  $m/e$  (% relative intensity) 418.2 (66) ( $\text{M} + \text{Na}$ ) $^+$ , 440.2 (100) ( $\text{M} + \text{Na}$ ) $^+$ ; HRMS (ESI) calcd for  $\text{C}_{22}\text{H}_{19}\text{N}_5\text{O}_4\text{Na}$  440.1329, found 440.1326.

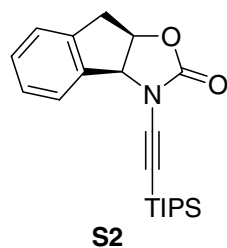

$R_f = 0.23$  [25% EtOAc in hexanes];  $[\alpha]_{\text{D}}^{20} = -13.8$  ( $c$  10.9,  $\text{CHCl}_3$ );  
IR (film)  $\text{cm}^{-1}$  2943(m), 2865(m), 2179(m), 1774(s), 1384 (s);  $^1\text{H}$  NMR (500 MHz,  $\text{CDCl}_3$ )  $\delta$  3.02 (s, 1 H), 3.31 (d,  $J = 17.5$  Hz, 1 H), 3.45 (dd, 1 H,  $J = 6.5, 17.5$  Hz), 5.38 (dd, 1 H,  $J = 2.0, 13$  Hz), 5.42 (dd, 1 H,  $J = 2.0$  Hz), 7.29-7.35 (m, 2 H), 7.39 (dd, 1 H,  $J = 6.5, 7.5$  Hz), 7.61 (d, 1 H,  $J = 8.0$  Hz);  $^{13}\text{C}$  NMR (125 MHz,  $\text{CDCl}_3$ )  $\delta$  33.5, 61.2, 65.1, 72.0, 78.9, 125.4, 125.5, 127.8, 130.3, 137.1, 140.0, 155.2; mass

spectrum (ESI):  $m/e$  (% relative intensity) 378.2 (79) ( $M + Na$ )<sup>+</sup>; HRMS (ESI) calcd for  $C_{21}H_{29}NO_2SiNa$  378.1865, found 378.1862.

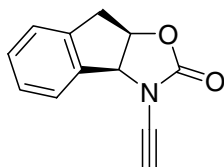

**20**

$R_f = 0.43$  [40% EtOAc in hexanes]; mp 64-65 °C;  $[\alpha]_D^{20} = 72.6$  ( $c$  9.50,  $CHCl_3$ ); IR (film)  $cm^{-1}$  3298(m), 2865(m), 2180(m), 2152(m), 1771(s), 1381 (s);  $^1H$  NMR (500 MHz,  $CDCl_3$ )  $\delta$  3.02 (s, 1 H), 3.31 (d, 1 H,  $J = 17.5$  Hz), 3.45 (dd, 1 H,  $J = 6.5, 17.5$  Hz), 5.38 (dd, 1 H,  $J = 2.0, 13$  Hz), 5.42 (dd, 1 H,  $J = 2.0$  Hz), 7.29-7.35 (m, 2 H), 7.39 (dd, 1 H,  $J = 6.5, 7.5$  Hz), 7.61 (d, 1 H,  $J = 8.0$  Hz);  $^{13}C$  NMR (125 MHz,  $CDCl_3$ )  $\delta$  33.5, 61.2, 65.1, 72.0, 78.9, 125.4, 125.5, 127.8, 130.3, 137.1, 140.0, 155.2; mass spectrum (ESI):  $m/e$  (% relative intensity) 222.1 (100) ( $M + Na$ )<sup>+</sup>; HRMS (ESI) calcd for  $C_{12}H_9NO_2Na$  222.0531, found 222.0527.

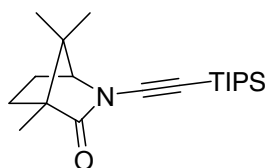

**S3**

$R_f = 0.42$  [10% EtOAc in hexanes]; IR (film)  $cm^{-1}$  2942(m), 2865(m), 2166(m), 1741(m), 1464, 1372 (m);  $^1H$  NMR (500 MHz,  $CDCl_3$ )  $\delta$  0.89 (s, 3 H), 0.99 (s, 3 H), 1.03 (s, 3 H), 1.04-1.08 (m, 21 H), 1.56 (dd,  $J = 3.5, 9.5, 13.5$ , 1 H), 1.72-1.82 (m, 2 H), 1.95 (ddd, 1 H,  $J = 2.0, 3.5, 10$  Hz), 3.52 (d, 1 H, 1.5 Hz);  $^{13}C$  NMR (125 MHz,  $CDCl_3$ )  $\delta$  9.3, 11.3, 17.8, 18.4, 18.6, 26.3, 30.3, 49.2, 53.8, 69.6, 71.3, 94.7, 179.5; mass spectrum (ESI):  $m/e$  (% relative intensity) 334.3 (24) ( $M + 1$ )<sup>+</sup>, 356.4 (100) ( $M + Na$ )<sup>+</sup>; HRMS (ESI) calcd for  $C_{20}H_{35}NOSiNa$  356.2386, found 356.2390.

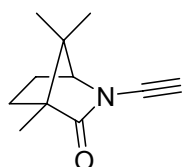

**21**

$R_f = 0.60$  [40% EtOAc in hexanes]; mp 102-103 °C;  $[\alpha]_D^{20} = -67.8$  ( $c$  9.00,  $CHCl_3$ );

IR (film)  $\text{cm}^{-1}$  3247(s), 2968 (m), 2134 (m), 1731(m), 1397, 1362 (m);  $^1\text{H}$  NMR (500 MHz,  $\text{CDCl}_3$ )  $\delta$  0.85 (dd, 3H,  $J = 2.5, 3.5$  Hz), 0.94 (dd, 3 H,  $J = 3.0, 4.0$  Hz), 0.99 (t, 3 H,  $J = 3.5$  Hz), 1.46-1.54 (m, 1 H), 1.68-1.78 (m, 2 H), 1.87-1.96 (m, 1 H), 2.83 (dd, 1 H,  $J = 2.5, 3.0$  Hz), 3.51 (d, 1 H,  $J = 2.5$  Hz);  $^{13}\text{C}$  NMR (125 MHz,  $\text{CDCl}_3$ )  $\delta$  9.3, 17.8, 18.4, 26.3, 30.3, 49.4, 53.8, 60.1, 70.8, 73.9, 180.0; mass spectrum (ESI):  $m/e$  (% relative intensity) 200.1 (100) ( $\text{M} + \text{Na}$ ) $^+$ ; HRMS (ESI) calcd for  $\text{C}_{11}\text{H}_{15}\text{NOSiNa}$  200.1050, found 200.1051.

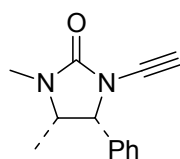

**22**

$R_f = 0.29$  [50% EtOAc in hexanes];  $[\alpha]_D^{20} = -212.7$  ( $c$  1.59,  $\text{CHCl}_3$ );

IR (film)  $\text{cm}^{-1}$  3266(s), 3035(w), 3005(w), 2984 (w), 2944(w), 2895(m), 1711(s), 1424(m), 1390(m), 1338(m), 1262(m), 1208 (w), 1154(m);  $^1\text{H}$  NMR (500 MHz,  $\text{CDCl}_3$ )  $\delta$  0.71 (d, 3 H,  $J = 6.0$  Hz), 2.62 (s, 1 H), 2.77 (s, 3 H), 3.86 (dq, 1 H,  $J = 6.0, 14.5$  Hz), 4.93 (d, 1 H,  $J = 14.5$  Hz), 7.15-7.20 (m, 2 H), 7.28-7.35 (m, 3 H);  $^{13}\text{C}$  NMR (125 MHz,  $\text{CDCl}_3$ )  $\delta$  14.9, 28.9, 55.6, 59.6, 63.5, 75.2, 127.6, 128.0, 128.4, 134.4, 157.7; mass spectrum (ESI):  $m/e$  (% relative intensity) 237.2 (100) ( $\text{M} + \text{Na}$ ) $^+$ ; HRMS (ESI) calcd for  $\text{C}_{13}\text{H}_{14}\text{N}_2\text{ONa}$  237.0998, found 237.1001.

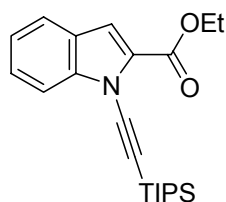

**S4**

$R_f = 0.63$  [20% EtOAc in hexanes];

IR (film)  $\text{cm}^{-1}$  2943(m), 2866(m), 2120(m), 1728(s), 1613(w), 1540(m), 1452(m), 1384(m), 1256(m), 1207(m), 1204(m), 1172(m), 1141(m), 1100(m);  $^1\text{H}$  NMR (500 MHz,  $\text{CDCl}_3$ )  $\delta$  1.21-1.25 (m, 21 H), 1.42 (t, 3 H,  $J = 7.0$  Hz), 4.44 (q, 2 H,  $J = 7.0$  Hz), 7.26-7.30 (m, 1 H), 7.33 (s, 1 H), 7.45-7.50 (m, 1 H), 7.61-7.65 (m, 1 H), 7.67 (d, 1 H,  $J = 7.5$  Hz);  $^{13}\text{C}$  NMR (125 MHz,  $\text{CDCl}_3$ )  $\delta$  11.5, 14.4, 18.8, 61.0, 72.0, 92.7, 112.3, 112.9, 122.7, 123.1, 126.0, 126.6, 129.6, 141.0, 160.0; mass spectrum (ESI):  $m/e$  (% relative intensity) 392.5 (100) ( $\text{M} + \text{Na}$ ) $^+$ ; HRMS (ESI) calcd for  $\text{C}_{22}\text{H}_{31}\text{NO}_2\text{Na}$  392.2016, found 392.2021.



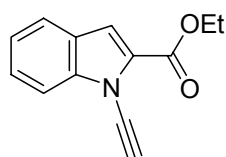

**23**

$R_f = 0.69$  [20% EtOAc in hexanes];

IR (film)  $\text{cm}^{-1}$  3300(s), 2982(m), 2151(m), 1721(s), 1613(w), 1542(m), 1450(m), 1399(m), 1386(m), 1255(m), 1205(m), 1172(m), 1167(m), 1096(m);  $^1\text{H}$  NMR (500 MHz,  $\text{CDCl}_3$ )  $\delta$  1.42 (t, 3 H,  $J = 7.0$  Hz), 3.33 (s, 1 H), 4.43 (q, 2 H,  $J = 7.0$  Hz), 7.25-7.29 (m, 1 H), 7.31 (s, 1 H), 7.46 (dd, 1 H,  $J = 7.5, 7.5$  Hz), 7.62-7.67 (m, 2 H);  $^{13}\text{C}$  NMR (125 MHz,  $\text{CDCl}_3$ )  $\delta$  14.3, 61.2, 61.6, 72.5, 112.1, 113.1, 122.8, 123.3, 126.0, 126.8, 129.2, 140.8, 160.2; mass spectrum (ESI):  $m/e$  (% relative intensity) 236.1 (100) ( $\text{M} + \text{Na}$ ) $^+$ ; HRMS (ESI) calcd for  $\text{C}_{13}\text{H}_{11}\text{NO}_2\text{Na}$  236.0682, found 236.0686.

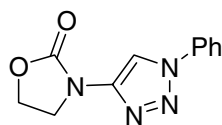

**25**

$R_f = 0.25$  [50% EtOAc in hexanes]; mp 179-180 °C;

IR (film)  $\text{cm}^{-1}$  1778(s), 1703(w), 1248(m), 1235(m), 1045(m);  $^1\text{H}$  NMR (500 MHz,  $\text{CDCl}_3$ )  $\delta$  4.33 (t, 2 H,  $J = 8.0$  Hz), 4.62 (t, 2 H,  $J = 8.0$  Hz), 7.45 (d, 1 H,  $J = 7.5$  Hz), 7.52 (dd, 2 H,  $J = 7.5, 7.5$  Hz), 7.76 (d, 2 H,  $J = 7.5$  Hz), 8.36 (s, 1 H);  $^{13}\text{C}$  NMR (125 MHz,  $\text{CDCl}_3$ )  $\delta$  43.7, 63.5, 109.9, 120.4, 129.0, 129.8, 137.0, 144.3, 154.9; mass spectrum (ESI):  $m/e$  (% relative intensity) 253.3 (100) ( $\text{M} + \text{Na}$ ) $^+$ ; HRMS (ESI) calcd for  $\text{C}_{11}\text{H}_{10}\text{N}_4\text{O}_2\text{Na}$  253.0696, found 253.0690

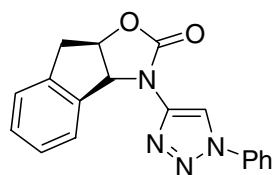

**26**

$R_f = 0.43$  [40% EtOAc in hexanes];  $[\alpha]_D^{20} = -174.5$  ( $c$  7.3,  $\text{CHCl}_3$ );

IR (film)  $\text{cm}^{-1}$  2964 (m), 2924 (w), 2360(s), 2339(m), 2239(m), 1788(s), 1701(s), 1456(w), 1422(w), 1386(w), 1262(m), 1194(s), 1097(s), 1024(s);  $^1\text{H}$  NMR (500 MHz,  $\text{CDCl}_3$ )  $\delta$  1.24 (t, 3H,  $J = 7.5$  Hz), 4.16 (dq, 2 H,  $J = 2.5, 7.5$  Hz); 4.33 (dt, 1 H,  $J = 2.5, 9.0$  Hz), 4.80 (t, 1 H,  $J = 9.0$  Hz), 5.16 (dt, 1 H,  $J = 2.5, 9.0$  Hz), 7.32-7.35 (m, 2H), 7.43-7.48 (m, 3 H);  $^{13}\text{C}$  NMR (75 MHz,  $\text{CDCl}_3$ )  $\delta$  38.7, 64.2, 79.7, 110.8, 120.5, 125.5, 127.4, 128.1, 129.1, 130.0, 130.1, 137.3, 138.7 140.2, 144.3, 154.2 (ESI):  $m/e$  (%)

relative intensity) 282.1 (100) ( $M + Na$ )<sup>+</sup>, 346.1 (2200) ( $M + Na + 2MeOH$ )<sup>+</sup>; HRMS (ESI) calcd for  $C_{14}H_{17}NO_4Na$  282.0737, found 282.0728.

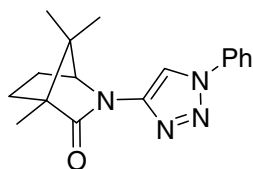

**27**

$R_f = 0.58$  [40% EtOAc in hexanes];  $[\alpha]_D^{20} = 204.0$  ( $c$  0.558,  $CHCl_3$ );

IR (film)  $cm^{-1}$  2969 (m), 1701 (s), 1576 (s), 1409 (m);  $^1H$  NMR (500 MHz,  $CDCl_3$ )  $\delta$  0.99 (s, 3 H), 1.00 (s, 3 H), 1.12 (s, 3 H), 1.51-1.58 (m, 2 H), 1.76 (ddd, 1 H,  $J = 4.0, 9.0, 13.5$  Hz), 1.86 (ddd, 1 H,  $J = 4.0, 10.5, 13.5$  Hz), 2.04-2.11 (m, 1 H), 4.49 (s, 1 H), 7.41 (t, 1 H,  $J = 7.5$  Hz), 7.49 (d, 1 H,  $J = 8.0$  Hz), 7.51 (d, 1 H,  $J = 8.0$  Hz), 7.73 (d, 2 H,  $J = 7.5$  Hz), 8.40 (s, 1 H);  $^{13}C$  NMR (75 MHz,  $CDCl_3$ )  $\delta$  9.3, 17.9, 18.5, 26.7, 30.9, 49.8, 55.3, 66.0, 110.6, 120.4, 128.7, 129.7, 137.2, 143.9, 177.0; mass spectrum (ESI):  $m/e$  (% relative intensity) 297.2 (21) ( $M + H$ )<sup>+</sup>, 319.2 (100) ( $M + Na$ )<sup>+</sup>; HRMS (ESI) calcd for  $C_{17}H_{20}N_4ONa$  319.1535, found 319.1533.

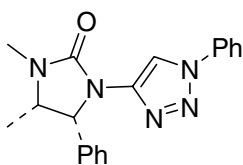

**28**

$R_f = 0.73$  [EtOAc]; mp 197-198 °C;  $[\alpha]_D^{20} = 28.9$  ( $c$  1.21,  $CHCl_3$ );

IR (film)  $cm^{-1}$  3161(w), 3138(w), 3028 (w), 2975(m), 2959(m), 2336(m), 1699(s), 1580(m), 1500(m), 1435(m), 1403(m), 1230(w), 1123(m);  $^1H$  NMR (500 MHz,  $CDCl_3$ )  $\delta$  0.88 (d, 3 H,  $J = 6.5$  Hz), 2.87 (s, 3 H), 4.03-4.10 (m, 1 H), 5.58 (d, 1 H,  $J = 8.0$  Hz), 7.21-7.32 (m, 5 H), 7.37 (t, 1 H,  $J = 8.0$  Hz), 7.46 (dd, 2 H,  $J = 8.0, 8.0$  Hz), 7.70 (d, 2 H,  $J = 8.0$  Hz), 8.40 (s, 1 H);  $^{13}C$  NMR (125 MHz,  $CDCl_3$ )  $\delta$  15.0, 28.6, 56.3, 60.9, 109.6, 120.0, 127.7, 128.1, 128.4, 128.5, 129.6, 136.2, 137.3, 145.0, 157.8; mass spectrum (ESI):  $m/e$  (% relative intensity) 334.2 (840) ( $M + H$ )<sup>+</sup>, 356.2 (100) ( $M + Na$ )<sup>+</sup>; HRMS (ESI) calcd for  $C_{19}H_{20}N_5O$  334.1662, found 334.1659.

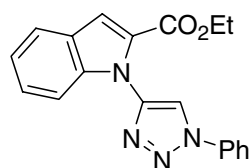

**29**

$R_f = 0.33$  [20% EtOAc in hexanes]; mp 112-114 °C;

IR (film)  $\text{cm}^{-1}$  3131(w), 3059(w), 2983(m), 1717(s), 1580(m), 1506(m), 1449(m), 1300(m), 1250(m), 1204(m), 1149(m);  $^1\text{H}$  NMR (500 MHz,  $\text{CDCl}_3$ )  $\delta$  1.31 (t, 3 H,  $J = 7.0$  Hz), 4.28 (q, 2 H,  $J = 7.0$  Hz), 7.22-7.27 (m, 1 H), 7.32-7.38 (m, 2 H), 7.48-7.53 (m, 2 H), 7.55-7.61 (m, 2 H), 7.72-7.76 (m, 1 H), 7.85 (d, 2 H,  $J = 8.0$  Hz), 8.20 (s, 1 H);  $^{13}\text{C}$  NMR (125 MHz,  $\text{CDCl}_3$ )  $\delta$  14.2, 60.8, 111.8, 113.1, 118.7, 120.5, 122.0, 122.5, 126.2, 126.5, 129.0, 129.1, 129.9, 137.0, 140.7, 143.2, 161.0; mass spectrum (ESI):  $m/e$  (% relative intensity) 333.1 (40) ( $\text{M} + \text{H}$ ) $^+$ , 355.1 (100) ( $\text{M} + \text{Na}$ ) $^+$ ; HRMS (ESI) calcd for  $\text{C}_{19}\text{H}_{16}\text{N}_4\text{O}_2\text{Na}$  355.1165, found 355.1174.

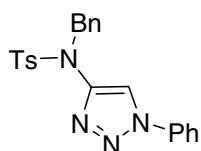

**30**

$R_f = 0.50$  [33% EtOAc in hexanes]; mp 179-181 °C;

IR (film)  $\text{cm}^{-1}$  3583(w), 1598(m), 1558(m), 1506(m), 1355(m), 1166(m), 1091(w);  $^1\text{H}$  NMR (500 MHz,  $\text{CDCl}_3$ )  $\delta$  2.42 (s, 3 H), 4.97 (s, 2 H), 7.22-7.30 (m, 6 H), 7.40-7.45 (m, 2 H), 7.50 (dd, 2 H,  $J = 8.0, 8.0$  Hz), 7.62 (d, 2 H,  $J = 8.0$  Hz), 7.69 (d, 2 H,  $J = 8.0$  Hz), 8.02 (s, 1 H);  $^{13}\text{C}$  NMR (125 MHz,  $\text{CDCl}_3$ )  $\delta$  21.6, 52.5, 111.7, 117.8, 120.1, 127.4, 127.8, 128.4, 128.8, 128.9, 129.7, 130.0, 135.2, 135.8, 136.8, 144.2; mass spectrum (ESI):  $m/e$  (% relative intensity) 405.2 (89) ( $\text{M} + \text{H}$ ) $^+$ , 427.2 (100) ( $\text{M} + \text{Na}$ ) $^+$ ; HRMS (ESI) calcd for  $\text{C}_{22}\text{H}_{20}\text{N}_4\text{O}_2\text{SNa}$  427.1199, found 427.1210.

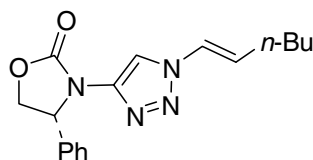

**32**

$R_f = 0.50$  [33% EtOAc in hexanes]; mp 88-91 °C;  $[\alpha]_D^{20} = 3.64$  ( $c$  1.54,  $\text{CHCl}_3$ );

IR (film)  $\text{cm}^{-1}$  2957(w), 2928(w), 2858(w), 2366(m), 1759(s), 1583(m), 1458(w), 1416(m), 1217(m), 1114(m), 1037(m);  $^1\text{H}$  NMR (500 MHz,  $\text{CDCl}_3$ )  $\delta$  0.84 (t, 3 H,  $J = 7.0$  Hz), 1.23-1.32 (m, 2 H), 1.33-1.41 (m, 2 H), 2.11 (dt, 2 H,  $J = 7.0, 7.0$  Hz), 4.32 (dd, 1 H,  $J = 4.5, 9.0$  Hz), 4.80 (dd, 1 H,  $J = 9.0, 9.0$  Hz), 5.61 (dd, 1 H,  $J = 4.5, 9.0$  Hz), 6.09 (td, 1 H,  $J = 7.0, 14.0$  Hz), 6.92 (d, 1 H,  $J = 14.0$  Hz), 7.21-

7.30 (m, 5 H), 8.01 (s, 1 H);  $^{13}\text{C}$  NMR (125 MHz,  $\text{CDCl}_3$ )  $\delta$  13.8, 22.1, 29.2, 31.0, 58.8, 71.4, 110.0, 123.7, 124.2, 126.5, 128.8, 129.1, 138.7, 142.7, 154.9; mass spectrum (ESI):  $m/e$  (% relative intensity) 335.2 (100) ( $\text{M} + \text{Na}$ ) $^+$ ; HRMS (ESI) calcd for  $\text{C}_{17}\text{H}_{20}\text{N}_4\text{O}_2\text{Na}$  335.1478, found 335.1482.

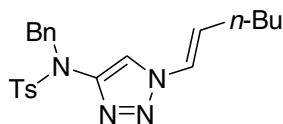

**33**

$R_f$  = 0.55 [33% EtOAc in hexanes]; mp 83-84  $^\circ\text{C}$ ;

IR (film)  $\text{cm}^{-1}$  3153(m), 3032(m), 2956(m), 2929(m), 2871(m), 2859(m), 1674(w), 1598(m), 1557(m), 1456(m), 1358(m), 1167(m);  $^1\text{H}$  NMR (300 MHz,  $\text{CDCl}_3$ )  $\delta$  0.95 (t, 3 H,  $J$  = 7.2 Hz), 1.34-1.54 (m, 4 H), 2.22 (dt, 2 H,  $J$  = 7.2, 7.2 Hz), 2.44 (s, 3 H), 4.94 (s, 2 H), 6.20 (dt, 1 H,  $J$  = 7.2, 14.4 Hz), 7.00 (d, 1 H,  $J$  = 14.4 Hz), 7.24-7.33 (m, 5 H), 7.41 (d, 2 H,  $J$  = 8.4 Hz), 7.61 (d, 2 H,  $J$  = 8.4 Hz), 7.78 (s, 1 H);  $^{13}\text{C}$  NMR (75 MHz,  $\text{CDCl}_3$ )  $\delta$  13.6, 21.4, 21.9, 29.1, 30.7, 52.2, 116.7, 123.8, 123.9, 127.3, 127.6, 128.3, 128.6, 129.7, 135.0, 135.6, 143.8, 144.1; mass spectrum (ESI):  $m/e$  (% relative intensity) 411.2 (18) ( $\text{M} + \text{H}$ ) $^+$ , 433.2 (100) ( $\text{M} + \text{Na}$ ) $^+$ ; HRMS (ESI) calcd for  $\text{C}_{22}\text{H}_{26}\text{N}_4\text{O}_2\text{SNa}$  433.1669, found 433.1669.

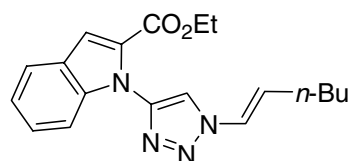

**34**

$R_f$  = 0.49 [20% EtOAc in hexanes]; mp 52-54  $^\circ\text{C}$ ;

IR (film)  $\text{cm}^{-1}$  3131(w), 3078(w), 2958(m), 2930(m), 2872(m), 2859(m), 1717(s), 1581(m), 1538(m), 1464(m), 1297(m), 1205(s), 1145(m);  $^1\text{H}$  NMR (300 MHz,  $\text{CDCl}_3$ )  $\delta$  0.99 (t, 3 H,  $J$  = 7.2 Hz), 1.26-1.38 (m, 3 H), 1.40-1.64 (m, 4 H), 2.31 (dt, 2 H,  $J$  = 7.2, 7.2 Hz), 4.30 (q, 2 H,  $J$  = 7.2 Hz), 6.37 (dt, 1 H,  $J$  = 7.2, 14.4 Hz), 7.17-7.40 (m, 4 H), 7.51 (s, 1 H), 7.75 (d, 1 H,  $J$  = 8.1 Hz), 7.95 (s, 1 H);  $^{13}\text{C}$  NMR (75 MHz,  $\text{CDCl}_3$ )  $\delta$  13.8, 14.2, 22.2, 29.3, 31.0, 60.8, 81.2, 111.8, 112.9, 117.6, 122.0, 122.5, 124.3, 124.4, 126.1, 126.4, 128.9, 140.7, 161.0; mass spectrum (ESI):  $m/e$  (% relative intensity) 339.1 (22) ( $\text{M} + \text{H}$ ) $^+$ , 361.1 (100) ( $\text{M} + \text{Na}$ ) $^+$ ; HRMS (ESI) calcd for  $\text{C}_{19}\text{H}_{22}\text{N}_4\text{O}_2\text{Na}$  361.1635, found 361.1632.

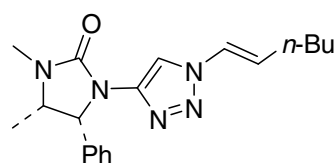

**35**

$R_f = 0.58$  [EtOAc]; mp 170-173 °C;  $[\alpha]_D^{20} = 53.8$  ( $c$  3.65, CHCl<sub>3</sub>);

IR (film) cm<sup>-1</sup> 3138(w), 3028 (w), 2964(m), 2926(m), 2857(m), 1699(s), 1587(m), 1404(m), 1285(w), 1229(w), 1215(w), 1107(m); <sup>1</sup>H NMR (300 MHz, CDCl<sub>3</sub>) δ 0.84-0.94 (m, 6 H), 1.28-1.52 (m, 4 H), 2.18 (dt, 2 H,  $J = 7.2, 7.2$  Hz), 2.86 (s, 3 H), 4.00-4.10 (m, 1 H), 5.54 (d, 1 H,  $J = 8.7$  Hz), 6.13 (td, 1 H,  $J = 7.2, 14.4$  Hz), 7.01 (d, 1 H,  $J = 14.4$  Hz), 7.19-7.32 (m, 5 H), 8.15 (s, 1 H); <sup>13</sup>C NMR (75 MHz, CDCl<sub>3</sub>) δ 13.6, 14.8, 21.9, 28.4, 29.0, 30.8, 56.0, 60.6, 108.4, 122.5, 124.4, 127.5, 127.9, 128.3, 136.1, 144.1, 157.6; mass spectrum (ESI):  $m/e$  (% relative intensity) 340.2 (85) (M + H)<sup>+</sup>, 362.2 (100) (M + Na)<sup>+</sup>; HRMS (ESI) calcd for C<sub>19</sub>H<sub>25</sub>N<sub>5</sub>ONa 362.1951, found 362.1954.

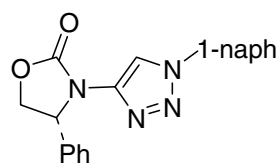

**36**

$R_f = 0.47$  [50% EtOAc in hexanes]; mp 177-180 °C;  $[\alpha]_D^{20} = -0.52$  ( $c$  0.383, CHCl<sub>3</sub>);

IR (film) cm<sup>-1</sup> 3582(w), 3175(w), 3067(w), 2924(w), 2338(m), 1760(s), 1582(m), 1500(m), 1418(m), 1214(m), 1100(w), 1035(m); <sup>1</sup>H NMR (500 MHz, CDCl<sub>3</sub>) δ 4.48 (dd, 1 H,  $J = 4.5, 8.5$  Hz), 4.95 (dd, 1 H,  $J = 8.5, 8.5$  Hz), 5.81 (dd, 1 H,  $J = 4.5, 8.5$  Hz), 7.35-7.63 (m, 10 H), 7.95 (d, 1 H,  $J = 8.5$  Hz), 7.95-8.02 (m, 1 H), 8.30 (s, 1 H); <sup>13</sup>C NMR (125 MHz, CDCl<sub>3</sub>) δ 59.1, 71.5, 108.4, 112.1, 115.8, 122.3, 123.5, 126.6, 127.1, 127.9, 128.3, 128.9, 129.3, 130.5, 133.6, 134.1, 135.3, 138.8, 142.8; mass spectrum (ESI):  $m/e$  (% relative intensity) 379.2 (100) (M + Na)<sup>+</sup>; HRMS (ESI) calcd for C<sub>21</sub>H<sub>16</sub>N<sub>4</sub>O<sub>2</sub>Na 379.1165, found 379.1158.

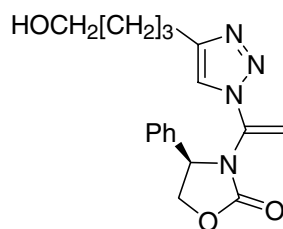

**38a**

$R_f = 0.27$  [EtOAc];  $[\alpha]_D^{20} = -70.7$  ( $c$  0.574, CHCl<sub>3</sub>);

IR (film)  $\text{cm}^{-1}$  3583(w), 2937(m), 28865(w), 1771(s), 1661(m), 1457(w), 1397(m), 1215(m), 1047(m);  $^1\text{H}$  NMR (500 MHz,  $\text{CDCl}_3$ )  $\delta$  1.56-1.65 (m, 2 H), 1.69-1.78 (m, 2 H), 1.86-2.04 (br, 1 H), 2.72 (t, 2 H,  $J = 7.0$  Hz), 3.67 (t, 2 H,  $J = 6.5$  Hz), 4.28 (dd, 1 H,  $J = 7.0, 9.0$  Hz), 4.79 (dd, 1 H,  $J = 9.0, 9.0$  Hz), 5.18-5.25 (m, 2 H), 5.28 (d, 1 H,  $J = 2.0$  Hz), 7.14-7.19 (m, 2 H), 7.24-7.28 (m, 1 H) 7.32-7.38 (m, 3 H);  $^{13}\text{C}$  NMR (125 MHz,  $\text{CDCl}_3$ )  $\delta$  25.0, 25.4, 32.0, 60.5, 62.4, 70.3, 104.1, 111.7, 120.6, 127.0, 129.3, 129.4, 133.9, 136.5, 155.4; mass spectrum (ESI):  $m/e$  (% relative intensity) 351.2 (100) ( $\text{M} + \text{Na}$ ) $^+$ ; HRMS (ESI) calcd for  $\text{C}_{17}\text{H}_{20}\text{N}_4\text{O}_3\text{Na}$  351.1428, found 351.1438.

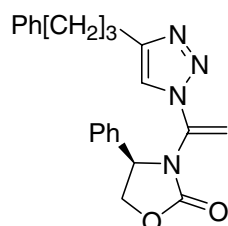

**38b**

$R_f = 0.46$  [50% EtOAc in hexanes];  $[\alpha]_D^{20} = -77.4$  ( $c$  0.773,  $\text{CHCl}_3$ ); IR (film)  $\text{cm}^{-1}$  3584(w), 3140(w), 3061(w), 3026(w), 2926(m), 2858(w), 1771(s), 1660(m), 1451(w), 1395(m), 1216(m), 1043(m);  $^1\text{H}$  NMR (500 MHz,  $\text{CDCl}_3$ )  $\delta$  1.97 (tt, 2 H,  $J = 7.5, 7.5$  Hz), 2.64-2.74 (m, 4 H), 4.28 (dd, 1 H,  $J = 7.0, 9.0$  Hz), 4.78 (dd, 1 H,  $J = 9.0, 9.0$  Hz), 5.21 (dd, 1 H,  $J = 7.0, 9.0$  Hz), 5.23 (d, 1 H,  $J = 2.5$  Hz), 5.27 (d, 1 H,  $J = 2.5$  Hz), 7.13-7.22 (m, 6 H), 7.24-7.35 (m, 5 H);  $^{13}\text{C}$  NMR (125 MHz,  $\text{CDCl}_3$ )  $\delta$  24.9, 30.8, 35.2, 60.5, 70.3, 104.0, 120.5, 126.0, 127.0, 128.4, 128.5, 129.3, 129.4, 133.9, 136.5, 141.7, 147.9, 155.4; mass spectrum (ESI):  $m/e$  (% relative intensity) 375.2 (151) ( $\text{M} + \text{Na}$ ) $^+$ , 397.2 (100) ( $\text{M} + \text{Na}$ ) $^+$ ; HRMS (ESI) calcd for  $\text{C}_{22}\text{H}_{22}\text{N}_4\text{O}_2\text{Na}$  397.1635, found 397.1637.

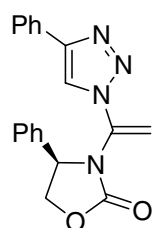

**38c**

$R_f = 0.45$  [50% EtOAc in hexanes]; mp 154-155  $^\circ\text{C}$ ;  $[\alpha]_D^{20} = -84.4$  ( $c$  0.289,  $\text{CHCl}_3$ ); IR (film)  $\text{cm}^{-1}$  3583(w), 3138(w), 3066(w), 3036(w), 2912(w), 1772(s), 1654(w), 1458(m), 1395(m), 1234(m), 1071(m), 1019(m);  $^1\text{H}$  NMR (500 MHz,  $\text{CDCl}_3$ )  $\delta$  4.33 (dd, 1 H,  $J = 7.0, 9.0$  Hz), 4.82 (dd, 1 H,  $J = 9.0, 9.0$  Hz), 5.23 (dd, 1 H,  $J = 7.0, 9.0$  Hz), 5.29-5.31 (m, 1 H), 5.38-5.40 (m, 1 H), 7.17-7.21 (m, 2 H), 7.33-7.39 (m, 4 H), 7.43-7.46 (m, 2 H), 7.67 (s, 1 H), 7.79 (dd, 1 H,  $J = 1.5, 6.5$  Hz);  $^{13}\text{C}$

NMR (125 MHz, CDCl<sub>3</sub>)  $\delta$  60.5, 70.3, 104.7, 119.1, 125.9, 127.0, 128.7, 128.9, 129.4, 129.5, 129.6, 133.9, 136.5, 143.8, 155.3; mass spectrum (ESI): m/e (% relative intensity) 333.4 (69) (M + Na)<sup>+</sup>, 355.4 (100) (M + Na)<sup>+</sup>; HRMS (ESI) calcd for C<sub>19</sub>H<sub>16</sub>N<sub>4</sub>O<sub>2</sub>Na 355.1165, found 355.1165.

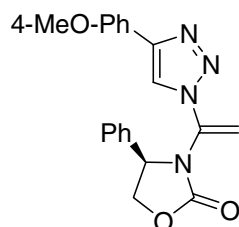

**38d**

R<sub>f</sub> = 0.55 [50% EtOAc in hexanes]; [ $\alpha$ ]<sub>D</sub><sup>20</sup> = - 123.0 (*c* 1.30, CHCl<sub>3</sub>);  
<sup>1</sup>H NMR (400 MHz, CDCl<sub>3</sub>)  $\delta$  3.84 (s, 3 H), 4.32 (dd, 1 H, *J* = 6.8, 8.8 Hz), 4.80 (dd, 1 H, *J* = 8.8, 8.8 Hz), 5.23 (dd, 1 H, *J* = 6.8, 8.8 Hz), 5.23 (dd, 1 H, *J* = 2.4 Hz), 5.37 (dd, 1 H, *J* = 2.4 Hz), 6.95 (td, 2 H, *J* = 2.0, 8.4 Hz), 7.17-7.20 (m, 2 H), 7.32-7.36 (m, 3 H), 7.60 (s, 1 H), 7.71 (td, 2 H, *J* = 2.0, 8.4 Hz);  
<sup>13</sup>C NMR (100 MHz, CDCl<sub>3</sub>)  $\delta$  55.6, 60.8, 70.5, 104.8, 114.6, 118.4, 122.5, 127.3, 127.4, 129.4, 129.6, 134.1, 136.7, 147.8, 155.6, 160.2; mass spectrum (MALDI): m/e (% relative intensity) 401.1 (100) (M + H)<sup>+</sup>; HRMS (MALDI) calcd for C<sub>20</sub>H<sub>19</sub>N<sub>4</sub>O<sub>3</sub> 363.1452, found 363.1431.

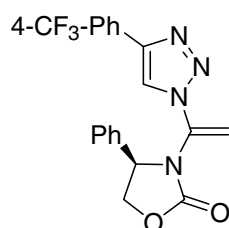

**38e**

R<sub>f</sub> = 0.50 [50% EtOAc in hexanes]; [ $\alpha$ ]<sub>D</sub><sup>20</sup> = - 84.0 (*c* 1.95, CHCl<sub>3</sub>);  
<sup>1</sup>H NMR (400 MHz, CDCl<sub>3</sub>)  $\delta$  4.34 (dd, 1 H, *J* = 7.2, 8.8 Hz), 4.82 (dd, 1 H, *J* = 8.8, 8.8 Hz), 5.23 (dd, 1 H, *J* = 7.2, 8.8 Hz), 5.28 (d, 1 H, *J* = 3.2 Hz), 5.41 (d, 1 H, *J* = 3.2 Hz), 7.21-7.24 (m, 2 H), 7.33-7.36 (m, 3 H), 7.67 (d, 2 H, *J* = 8.0 Hz), 7.82 (s, 1 H), 7.90 (d, 2 H, *J* = 8.0 Hz); <sup>13</sup>C NMR (100 MHz, CDCl<sub>3</sub>)  $\delta$  61.1, 70.7, 105.3, 120.3, 126.2, 126.3, 127.3, 129.7, 129.8, 130.5, 130.8, 133.4, 134.1, 136.5, 146.5, 155.6; mass spectrum (MALDI): m/e (% relative intensity) 401.1 (100) (M + H)<sup>+</sup>; HRMS (MALDI) calcd for C<sub>20</sub>H<sub>16</sub>F<sub>3</sub>N<sub>4</sub>O<sub>2</sub> 401.1220, found 401.1205.
